# Supplementary material for: Structural and pragmatic language in young children with sex chromosome trisomy (XXX, XXY, XYY): Predictive value for neurobehavioral problems one year later
Source: PubMed Central journal article supplement — Clin Neuropsychol. Author manuscript; Available in PMC 2024 Apr 22. (PMC11033613; doi:10.1080/13854046.2022.2067078), 2022-04-28
Supplement: NIHMS1982705-supplement-supp.pdf [file NIHMS1982705-supplement-supp.pdf]

**Supplementary Materials**

**A. Correlation Matrices Pragmatic Language Subdomains and Included Variables Regression Analyses – SCT group only**

Table A1. Correlations Pragmatic Language Subdomains ( $N = 72$ )

|                                                      | 1. Nonverbal communication | 2. Requesting, giving, and responding to information |
|------------------------------------------------------|----------------------------|------------------------------------------------------|
| 1. Nonverbal communication                           | -                          |                                                      |
| 2. Requesting, giving, and responding to information | .69***                     | -                                                    |
| 3. Conversational routines                           | .70***                     | .80***                                               |

\*  $p < .05$ ; \*\*  $p < .01$ ; \*\*\*  $p < .001$

Table A2. Correlations Structural Language, Total Pragmatic Score, and Behavioral Outcomes

|                            | 1.<br>Structural<br>language | 2.<br>Pragmatic<br>total score | 3.<br>Anxiety | 4.<br>Affective | 5.<br>Oppositional<br>defiant | 6.<br>Attention<br>deficit | 7.<br>Pervasive<br>developmental |
|----------------------------|------------------------------|--------------------------------|---------------|-----------------|-------------------------------|----------------------------|----------------------------------|
| 1. Structural language     | -                            |                                |               |                 |                               |                            |                                  |
| 2. Pragmatic total score   | .18                          | -                              |               |                 |                               |                            |                                  |
| 3. Anxiety                 | -.12                         | -.22                           | -             |                 |                               |                            |                                  |
| 4. Affective               | -.27                         | -.40**                         | .38**         | -               |                               |                            |                                  |
| 5. Oppositional defiant    | -.06                         | -.41**                         | .30*          | .63***          | -                             |                            |                                  |
| 6. Attention deficit       | -.38**                       | -.56***                        | .30*          | .68***          | .63***                        | -                          |                                  |
| 7. Pervasive developmental | -.62***                      | -.63***                        | .62***        | .61***          | .33                           | .46*                       | -                                |
| 8. Social-emotional        | -.37*                        | -.68***                        | .32*          | .59***          | .61***                        | .75***                     | .64***                           |

\*  $p < .05$ ; \*\*  $p < .01$ ; \*\*\*  $p < .001$

Note:  $N_{range} = 29-72$
